# Supplementary material for: Inhibition of fibrous dysplasia via blocking Gsα with suramin sodium loaded with an alendronate-conjugated polymeric drug delivery system
Source: Royal Society of Chemistry journal article supplement (doi:10.1039/c6bm00091f), 2016-01-01
Supplement: c6bm00091f1.pdf [file c6bm00091f1.pdf]

# Inhibition of fibrous dysplasia via blocking Gs $\alpha$ with suramin sodium loaded by alendronate-conjugated polymeric drug delivery system

Mingming Lv,<sup>†a</sup> Xiao Li,<sup>†b</sup> Yu Huang,<sup>c</sup> Nan Wang,<sup>c</sup> Xinyuan Zhu,<sup>\*c</sup> and Jian Sun<sup>\*a</sup>

<sup>a</sup>Department of Oral Maxillofacial-Head Neck Oncology, Ninth People's Hospital, Shanghai Jiao Tong University School of Medicine, Shanghai Key Laboratory of Stomatology, 639 Zhizaoju Road, Shanghai 200011, People's Republic of China

<sup>b</sup>Department of Oral and Maxillofacial Surgery, The First Affiliated Hospital of Harbin Medical University, 23 Youzheng Street, Nangang District, Harbin 150001, People's Republic of China

<sup>c</sup>School of Chemistry and Chemical Engineering, Shanghai Key Lab of Electrical Insulation and Thermal Aging, Shanghai Jiao Tong University, 800 Dongchuan Road, Shanghai 200240, People's Republic of China

<sup>†</sup>These authors are joint first authors.

\*Correspondence to: xyzhu@sjtu.edu.cn; jianjian60@yahoo.com

Telephone: +86-21-54746215; Fax: +86-21-54741297

### Terminal units

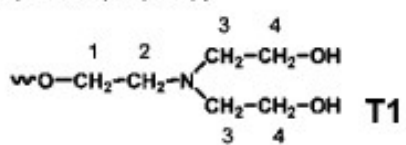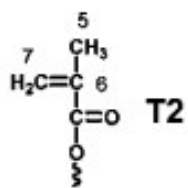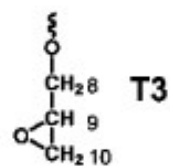

### Linear units

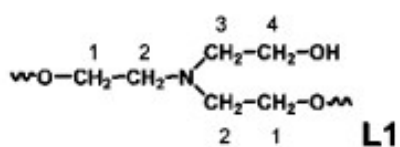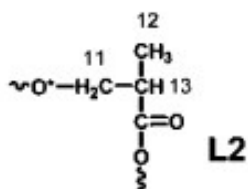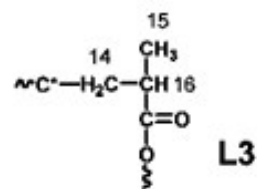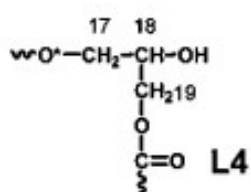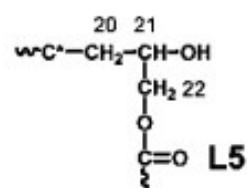

### Dendritic units

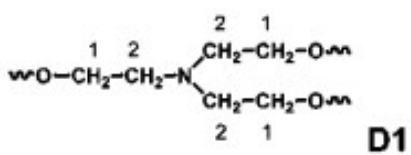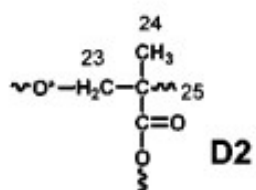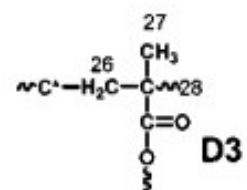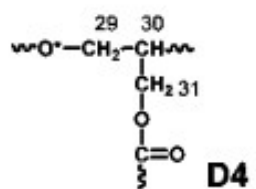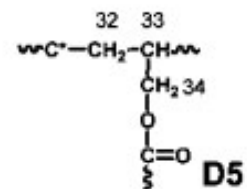

Figure S1. The structure units of HBPAE.

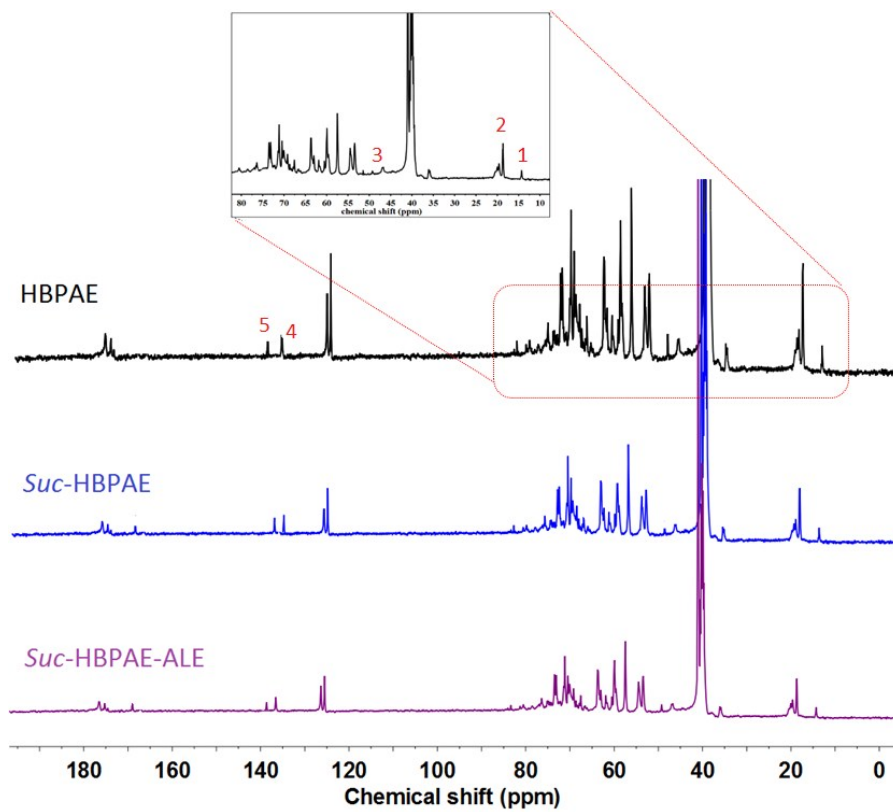

**Figure S2.** The  $^{13}\text{C}$  NMR spectra of HBPAE, Suc-HBPAE and Suc-HBPAE-ALE in  $\text{D}_2\text{O}$ .

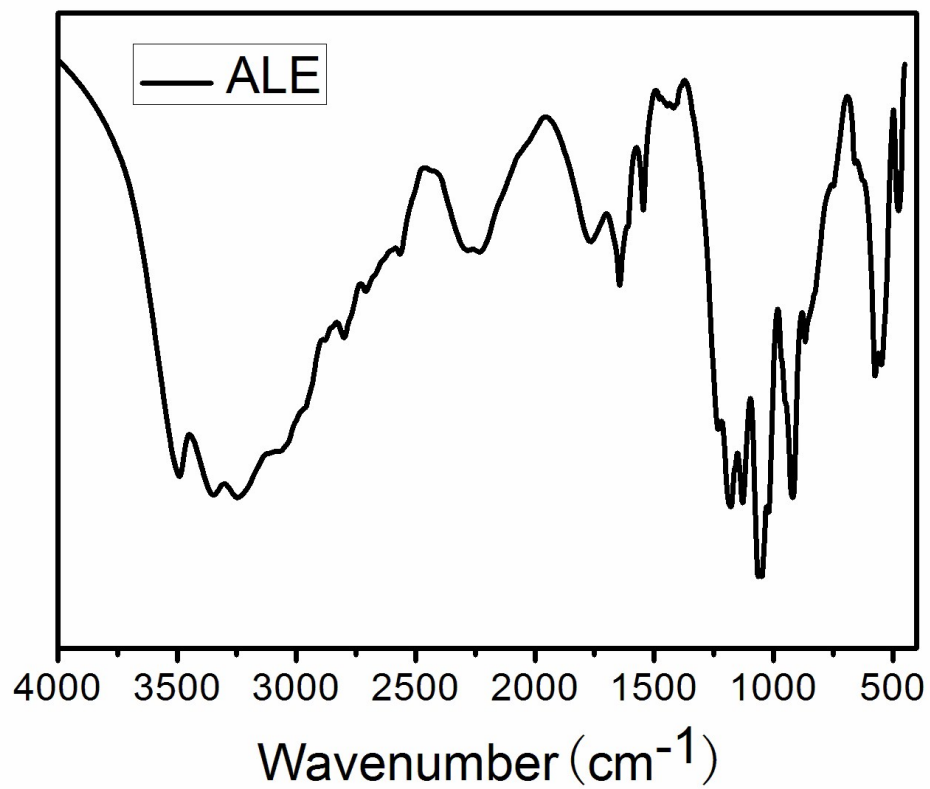

**Figure S3.** The FTIR spectrum of ALE.
